# Supplementary material for: Volatile Fatty Acids from Lipid-Extracted Yeast Provide Additional Feedstock for Microbial Lipid Production
Source: MDPI journal article supplement (doi:10.3390/catal11081009), 2021-08-21
Supplement: s1 [file s1]

## Supplementary Materials

### Volatile Fatty Acid Production from Lipid-Extracted Yeast as a Feedstock for Economical Microbial Lipid Production

Gwon Woo Park<sup>1,\*</sup>, Seongsoo Son<sup>2</sup>, Myounghoon Moon<sup>1</sup>, Subin Sin<sup>1</sup>, Kyoungseon Min<sup>1</sup>, Jin-Suk Lee<sup>1</sup> and Ho Nam Chang<sup>3</sup>

<sup>1</sup>Gwangju Bio/Energy R&D Center, Korea Institute of Energy Research, Gwangju 61003, Korea

<sup>2</sup>Kobiolabs, Seoul 08826, Korea

<sup>3</sup>Department of Chemical and Biomolecular Engineering, Korea Institute of Advanced Science and Technology, Daejeon 34141, Korea

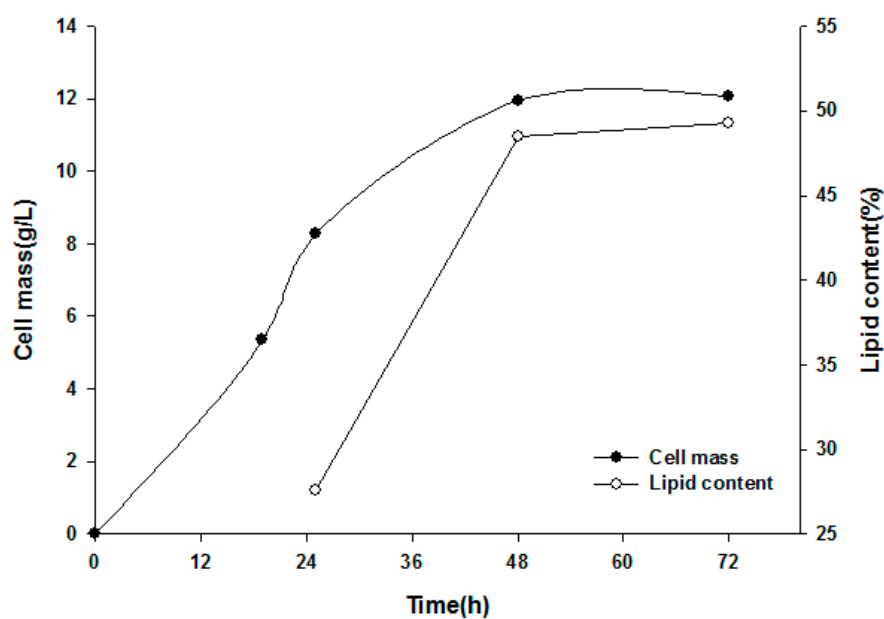

Figure S1. Growth curve and accumulation of lipids during incubation of *Cryptococcus curvatus* for 72 h.
