# Supplementary material for: Volatile Fatty Acids from Lipid-Extracted Yeast Provide Additional Feedstock for Microbial Lipid Production
Source: MDPI journal article supplement (doi:10.3390/catal11081009), 2021-08-21
Supplement: s1 [file s1]

Archive with 1 entries (1 files):
- catalysts-1331682-supplementary.pdf
